# Supplementary material
Source: MDPI journal article supplement (https://www.mdpi.com/2304-6740/12/3/78)
Supplement: s1 [file s1]

# Perhalophenyl-phosphide: a couple needed to stabilize phosphide gold complexes

Laura Coconubo-Guio,<sup>1</sup> María Rodríguez-Castillo,<sup>1</sup> Sonia Moreno,<sup>1</sup> Miguel Monge,<sup>1</sup> M. Elena Olmos<sup>1,\*</sup> and José M. López-de-Luzuriaga<sup>1,\*</sup>

<sup>1</sup> Departamento de Química, Centro de Investigación en Síntesis Química (CISQ), Complejo Científico Tecnológico, Universidad de La Rioja, Madre de Dios 53, Logroño, 26006, Spain

\* Correspondence: josemaria.lopez@unirioja.es, m-elena.olmos@unirioja.es

## Supplementary Material

## Characterization of the complexes

### IR Spectra

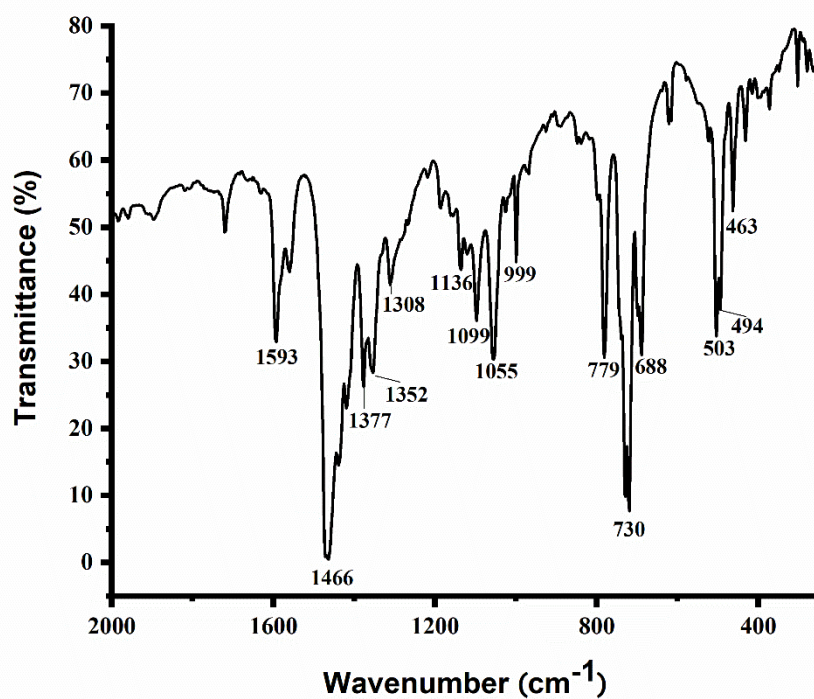

Figure S1. FT-IR spectrum of complex  $[\{Au(C_6Cl_2F_3)_2\}_2(\mu-PPh_2)_2]$  (1)

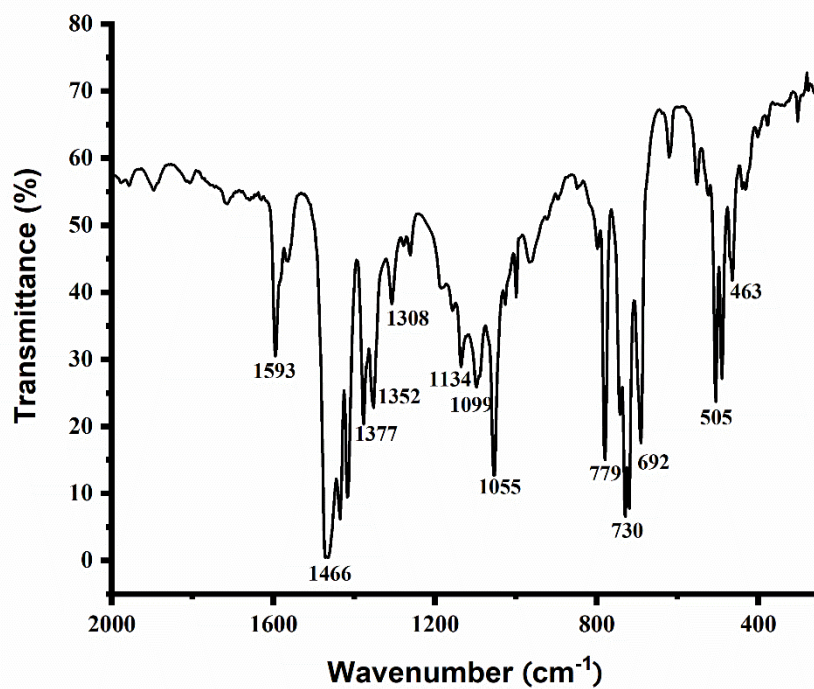

Figure S2. FT-IR spectrum of complex  $[\{Au(C_6Cl_2F_3)_2\}_2(\mu-PPh_2)_2Au_2]$  (2)

**$^1\text{H}$  NMR spectra (298K,  $\text{CDCl}_3$ )**

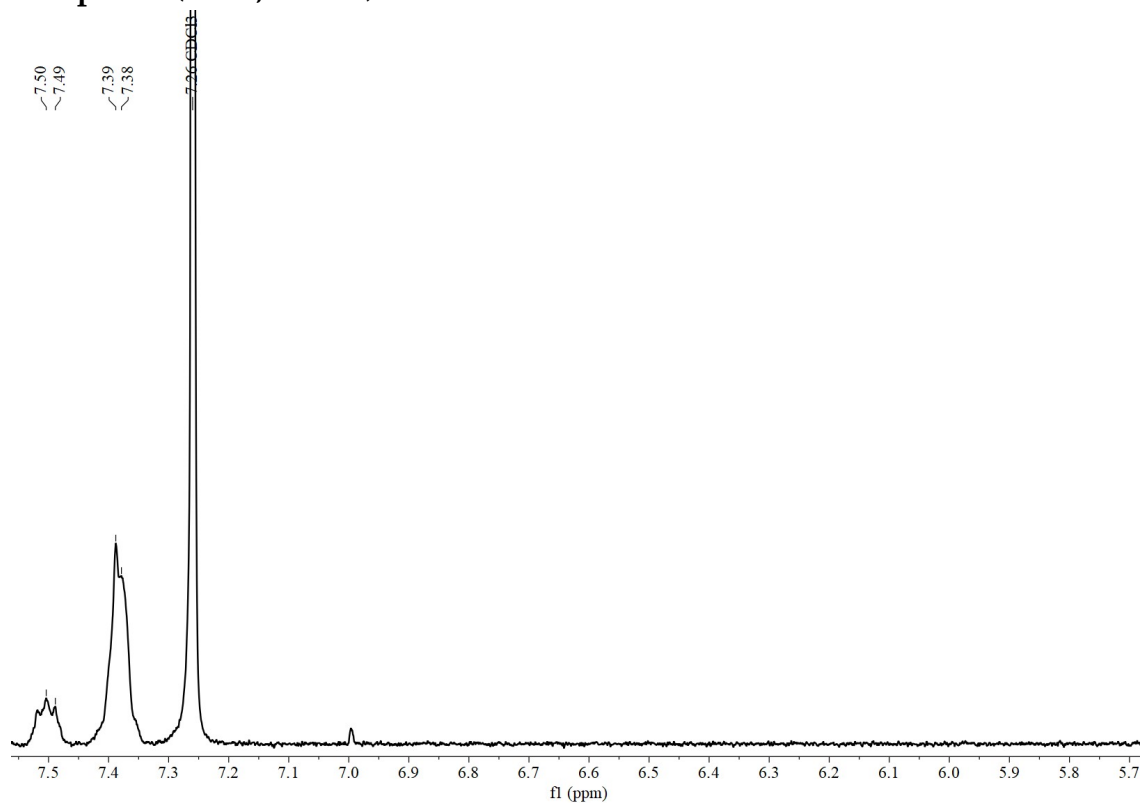

**Figure S3.**  $^1\text{H}$  NMR spectrum of complex  $[\{\text{Au}(\text{C}_6\text{Cl}_2\text{F}_3)_2\}_2(\mu\text{-PPh}_2)_2]$  (**1**)

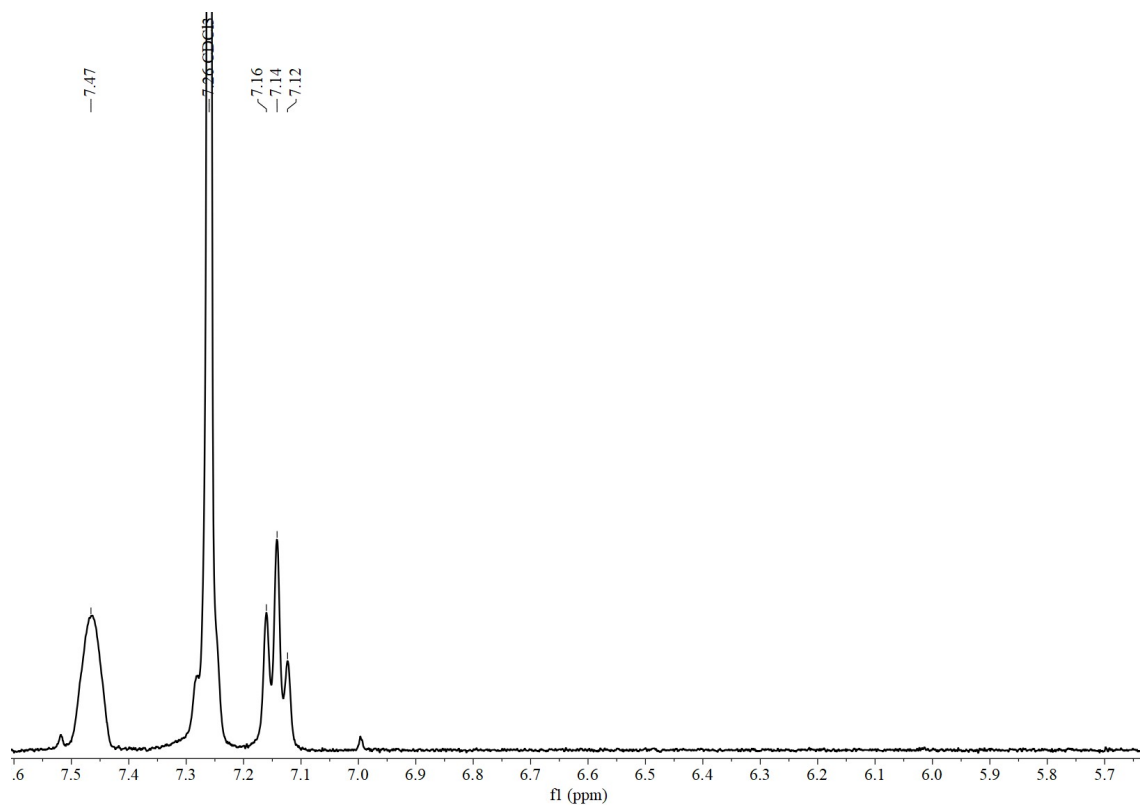

**Figure S4.**  $^1\text{H}$  NMR spectrum of complex  $[\{\text{Au}(\text{C}_6\text{Cl}_2\text{F}_3)_2(\mu\text{-PPh}_2)_2\text{Au}\}_2]$  (**2**)

**$^{19}\text{F}$  NMR spectra (298K,  $\text{CDCl}_3$ )**

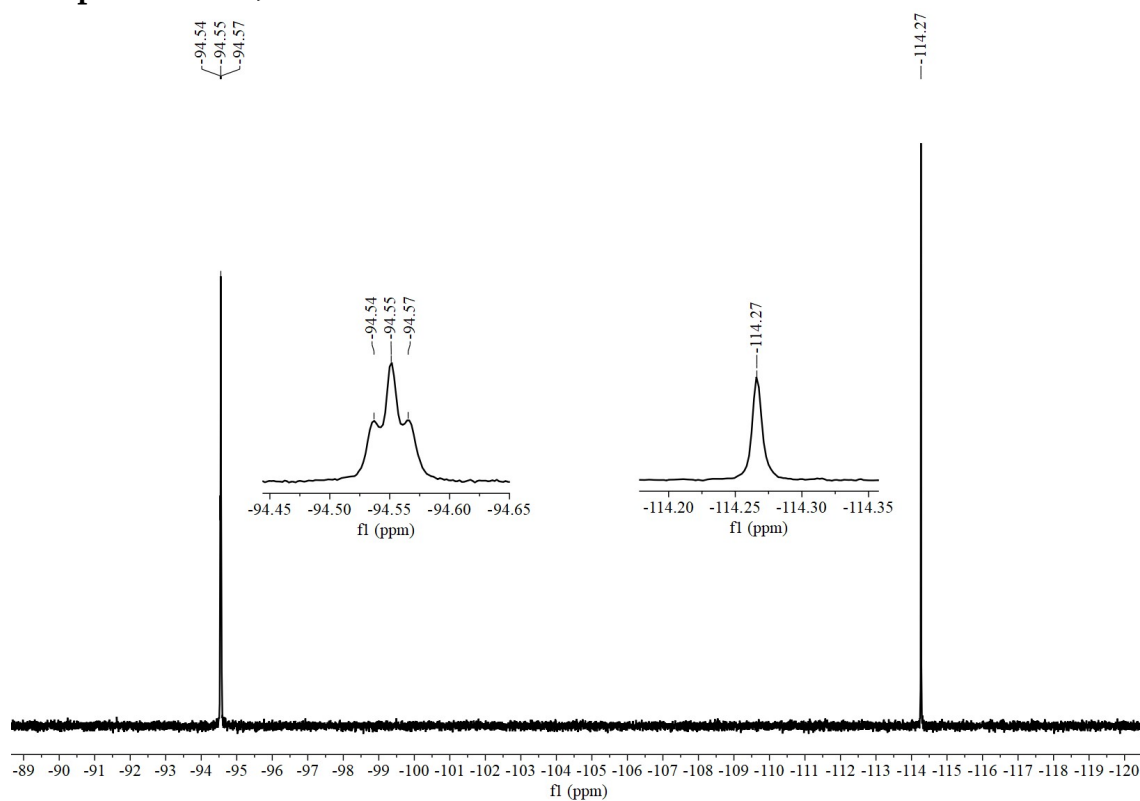

**Figure S5.**  $^{19}\text{F}$  NMR spectrum of complex  $[\{\text{Au}(\text{C}_6\text{Cl}_2\text{F}_3)_2\}_2(\mu\text{-PPh}_2)_2]$  (**1**)

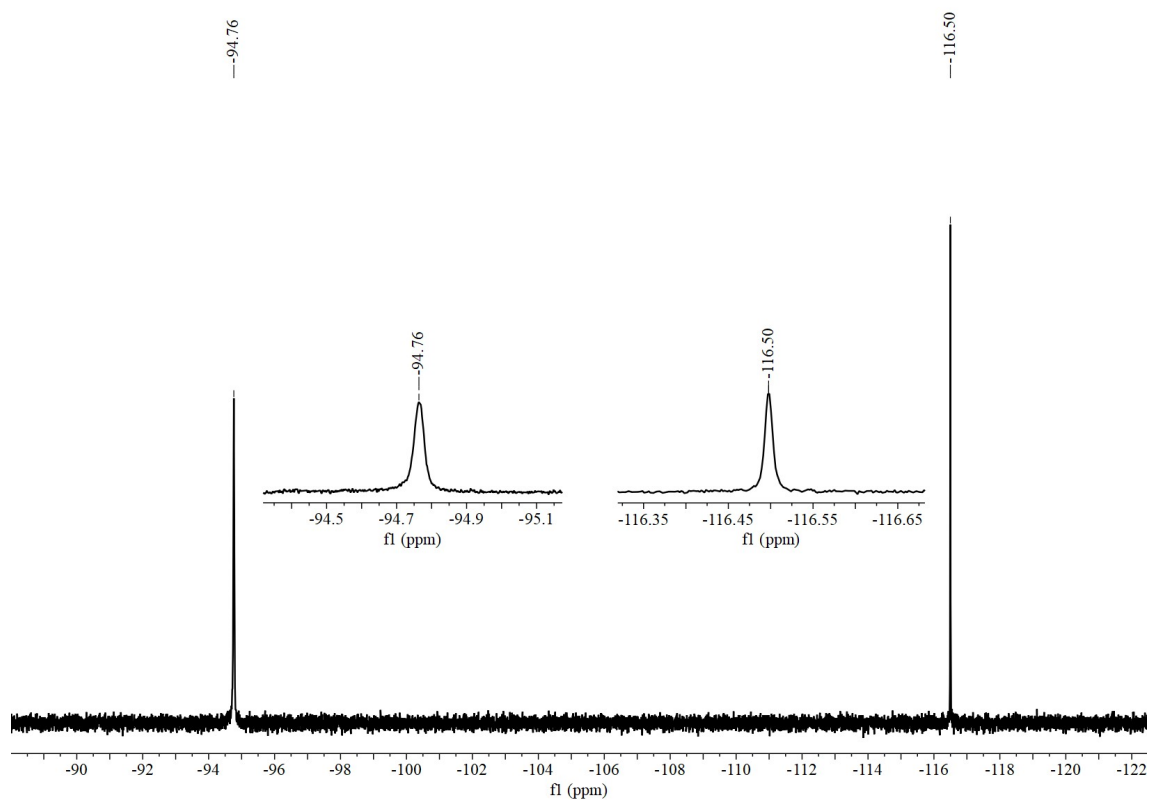

**Figure S6.**  $^{19}\text{F}$  NMR spectrum of complex  $[\{\text{Au}(\text{C}_6\text{Cl}_2\text{F}_3)_2(\mu\text{-PPh}_2)_2\text{Au}\}_2]$  (**2**)

$^{31}\text{P}\{^1\text{H}\}$  NMR spectra (298K,  $\text{CDCl}_3$ )

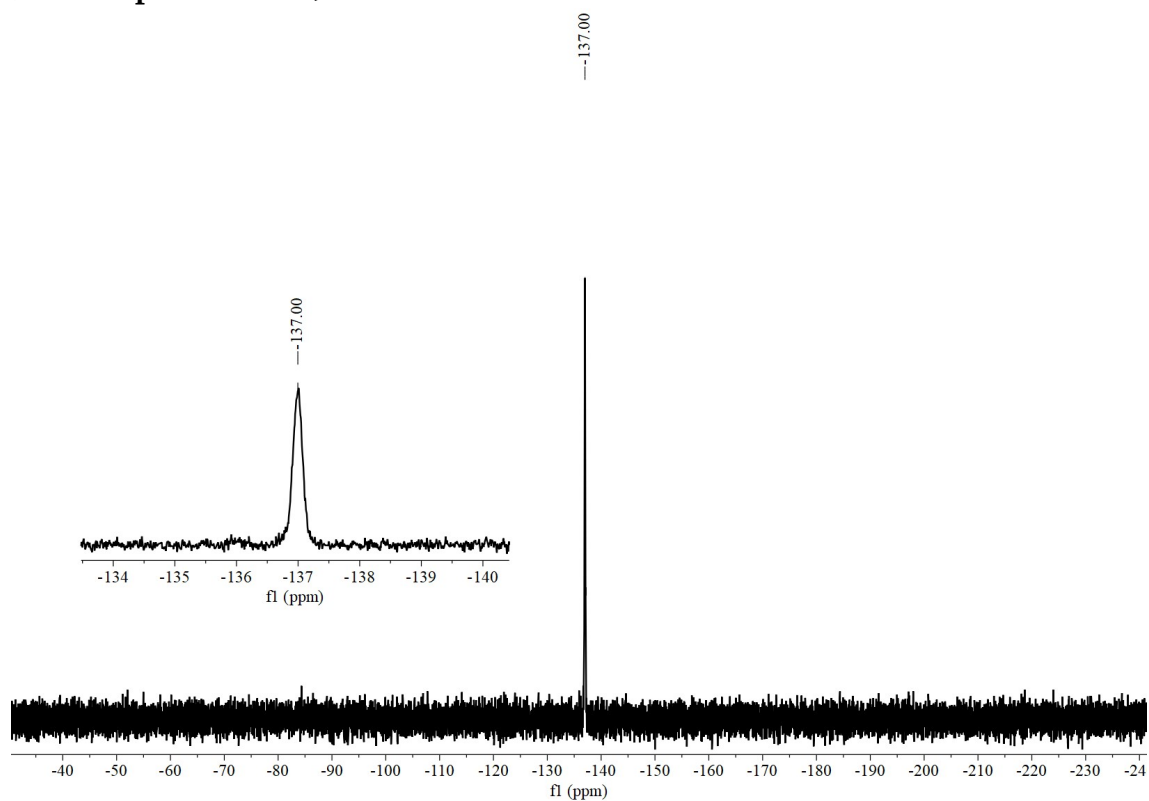

Figure S7.  $^{31}\text{P}\{^1\text{H}\}$  NMR spectrum of complex  $[\{\text{Au}(\text{C}_6\text{Cl}_2\text{F}_3)_2(\mu\text{-PPh}_2)_2\}]$  (1)

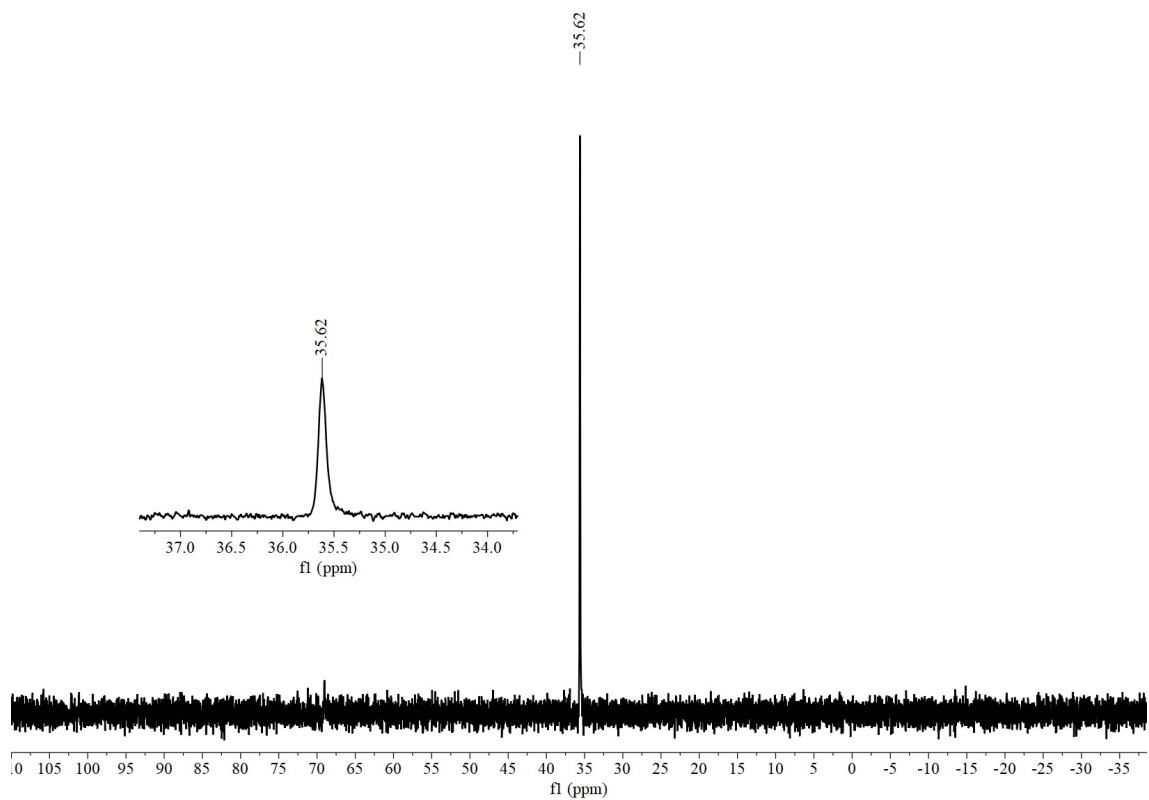

Figure S8.  $^{31}\text{P}\{^1\text{H}\}$  NMR spectrum of complex  $[\{\text{Au}(\text{C}_6\text{Cl}_2\text{F}_3)_2(\mu\text{-PPh}_2)_2\text{Au}\}_2]$  (2)

## High resolution mass spectra (HRMS)

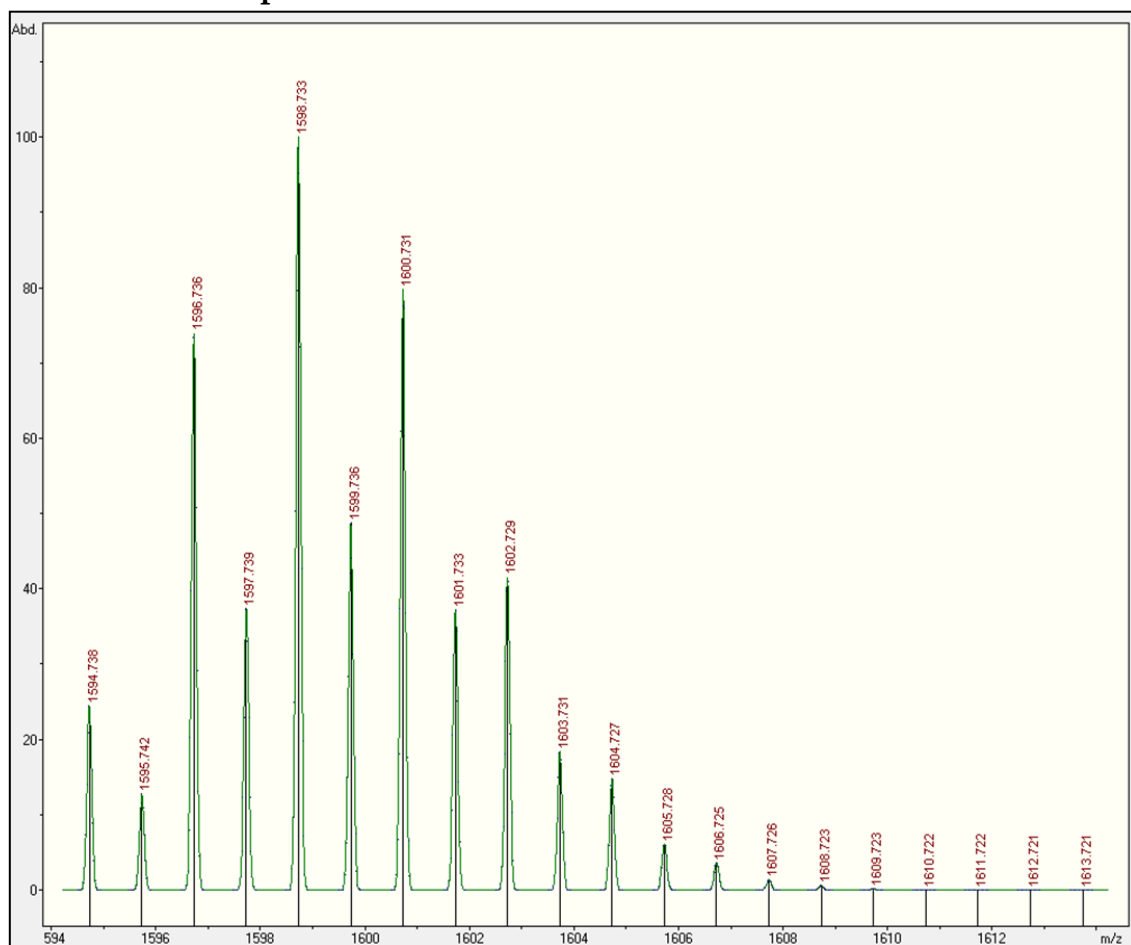

**Figure S9.** Simulated isotope pattern of (M+Cl)<sup>-</sup> for compound **1**. Ion formula: C<sub>48</sub>H<sub>20</sub>Au<sub>2</sub>Cl<sub>9</sub>F<sub>12</sub>P<sub>2</sub>.

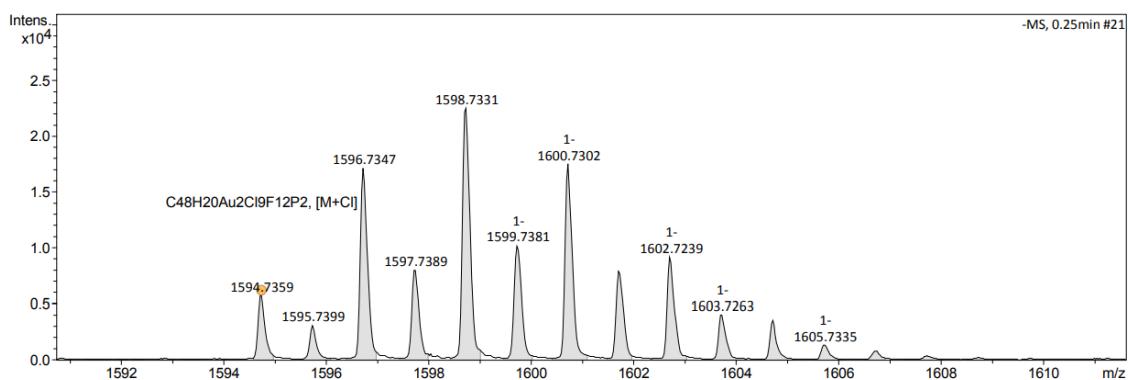

**Figure S10.** HR-MS (ESI<sup>-</sup>) for compound **1**. Ion formula: C<sub>48</sub>H<sub>20</sub>Au<sub>2</sub>Cl<sub>9</sub>F<sub>12</sub>P<sub>2</sub>. [{Au(C<sub>6</sub>Cl<sub>2</sub>F<sub>3</sub>)<sub>2</sub>]<sub>2</sub>(μ-PPh<sub>2</sub>)<sub>2</sub>Cl]<sup>-</sup>: 1594.738223 Da. Measured m/z= 1594.7359 (M+Cl)<sup>-</sup>.

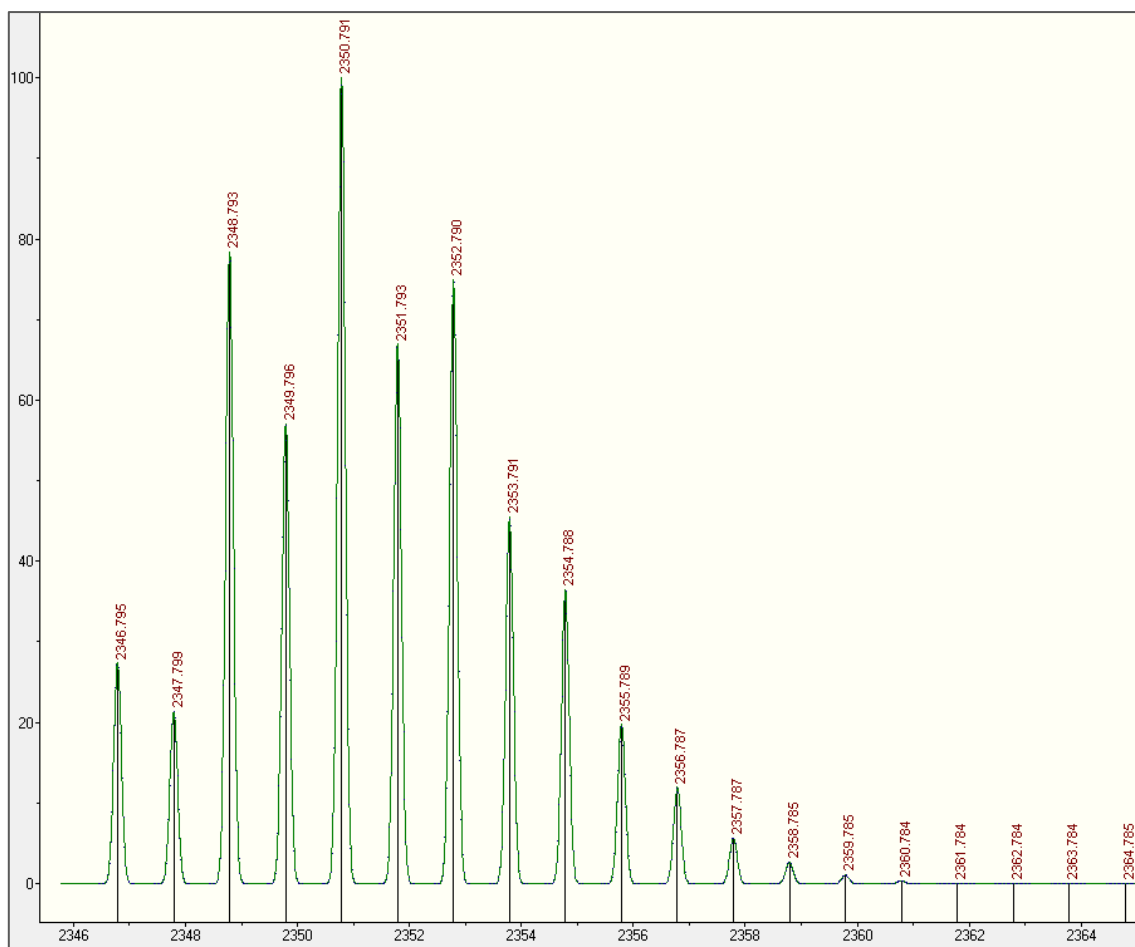

**Figure S11.** Simulated isotope pattern of (M+Na)<sup>+</sup> for compound **2**. Ion formula: C<sub>72</sub>H<sub>40</sub>Au<sub>4</sub>Cl<sub>8</sub>F<sub>12</sub>P<sub>4</sub>Na<sub>1</sub>

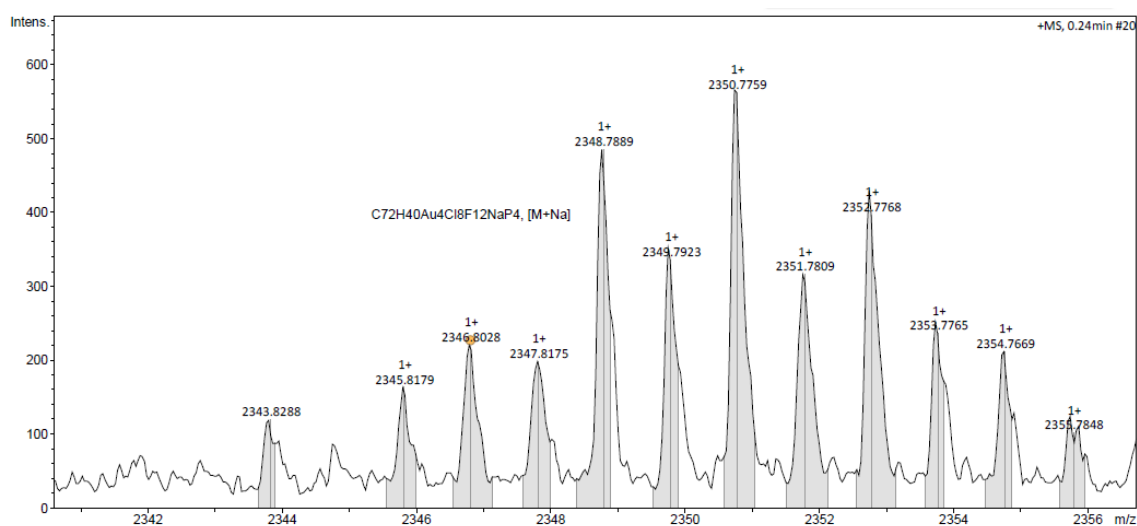

**Figure S12.** HR-MS (ESI<sup>+</sup>) for compound **2**. Ion formula: C<sub>72</sub>H<sub>40</sub>Au<sub>4</sub>Cl<sub>8</sub>F<sub>12</sub>P<sub>4</sub>Na<sub>1</sub>. [[{Au(C<sub>6</sub>Cl<sub>2</sub>F<sub>3</sub>)<sub>2</sub>(μ-PPh<sub>2</sub>)<sub>2</sub>Au}<sub>2</sub>][Na]<sup>+</sup>: 2346.795203 Da. Measured m/z = 2346.8028 (M+Na)<sup>+</sup>.

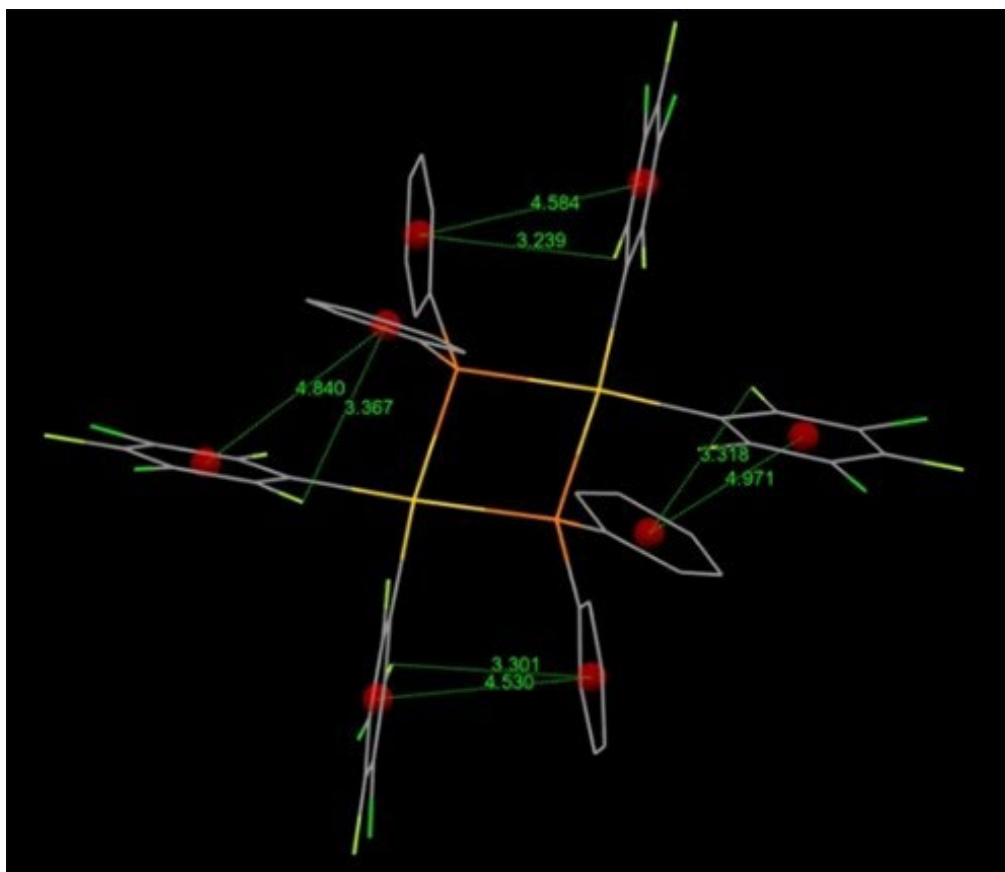

**Figure S13.** Shortest F...centroid distances found for  $\pi$ - $\pi$  interactions in **1**. Distances are indicated in Å.

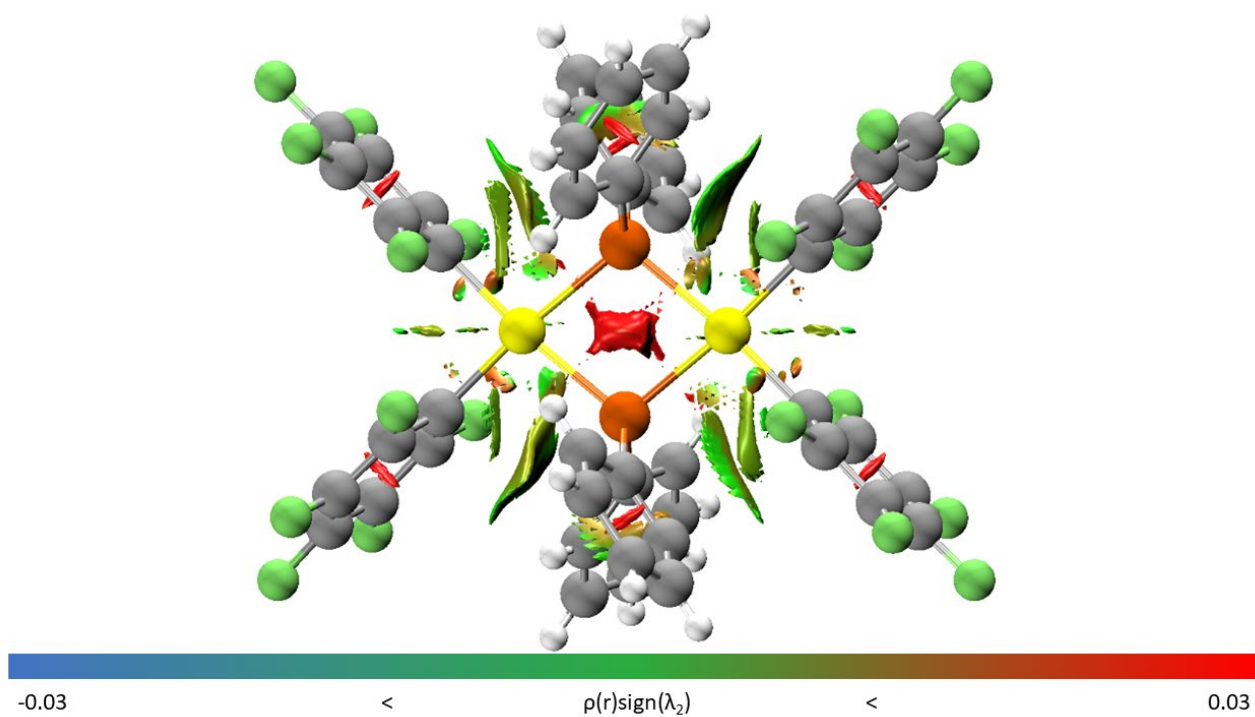

**Figure S14.** NCI-index isosurfaces from X-Ray for  $[\{\text{Au}(\text{C}_6\text{F}_5)_2\}_2(\mu\text{-PPh}_2)_2]$  complex. The isosurface value of  $s$  equals 0.5 a.u. and the electron density is such that  $\rho \leq 0.015$  a.u. The scale for the relative magnitude of the interactions is presented at the bottom of the figure.



**Table S1.** Crystallographic data and structure refinement details for compounds **1** and **2**.

| Compound                                      | <b>1</b>                                                                                       | <b>2</b>                                                                                       |
|-----------------------------------------------|------------------------------------------------------------------------------------------------|------------------------------------------------------------------------------------------------|
| <b>Empirical formula</b>                      | C <sub>48</sub> H <sub>20</sub> Au <sub>2</sub> Cl <sub>8</sub> F <sub>12</sub> P <sub>2</sub> | C <sub>72</sub> H <sub>40</sub> Au <sub>4</sub> Cl <sub>8</sub> F <sub>12</sub> P <sub>4</sub> |
| <b>Formula weight</b>                         | 1564.11                                                                                        | 2328.381                                                                                       |
| <b>Temperature/K</b>                          | 100(2)                                                                                         | 100(2)                                                                                         |
| <b>Crystal system</b>                         | Monoclinic                                                                                     | Orthorhombic                                                                                   |
| <b>Space group</b>                            | P2 <sub>1</sub> /n                                                                             | Pbca                                                                                           |
| <b>a/Å</b>                                    | 13.1373(18)                                                                                    | 23.750(2)                                                                                      |
| <b>b/Å</b>                                    | 18.0771(16)                                                                                    | 22.049(2)                                                                                      |
| <b>c/Å</b>                                    | 22.9937(19)                                                                                    | 27.057(3)                                                                                      |
| <b>α/°</b>                                    | 90                                                                                             | 90                                                                                             |
| <b>β/°</b>                                    | 94.556(3)                                                                                      | 90                                                                                             |
| <b>γ/°</b>                                    | 90                                                                                             | 90                                                                                             |
| <b>Volume/Å<sup>3</sup></b>                   | 5443.4(8)                                                                                      | 14169(2)                                                                                       |
| <b>Z</b>                                      | 4                                                                                              | 8                                                                                              |
| <b>ρ<sub>calcd</sub>/g·cm<sup>-3</sup></b>    | 1.909                                                                                          | 2.183                                                                                          |
| <b>μ/mm<sup>-1</sup></b>                      | 5.910                                                                                          | 8.725                                                                                          |
| <b>F(000)</b>                                 | 2960                                                                                           | 8736                                                                                           |
| <b>Crystal size/mm<sup>3</sup></b>            | 0.255x0.211x0.079                                                                              | 0.139 x 0.138 x 0.074                                                                          |
| <b>Radiation</b>                              | MoKα<br>(λ = 0.71073)                                                                          | MoKα<br>(λ = 0.71073)                                                                          |
| <b>2θ range for data collection/°</b>         | 5.788 to 55.876                                                                                | 5.67 to 55.85                                                                                  |
| <b>Index ranges</b>                           | -17≤h≤17                                                                                       | -31≤h≤31                                                                                       |
|                                               | -23≤k≤23                                                                                       | -29≤k≤29                                                                                       |
|                                               | -30≤l≤30                                                                                       | -35≤l≤35                                                                                       |
| <b>Reflections collected</b>                  | 137218                                                                                         | 709062                                                                                         |
| <b>Independent reflections</b>                | 12985                                                                                          | 16899                                                                                          |
|                                               | [R(int) = 0.0525]                                                                              | [R(int) = 0.0271]                                                                              |
| <b>Completeness to theta = 25.242°</b>        | 99.4 %                                                                                         | 99.8 %                                                                                         |
| <b>Data/restraints/parameters</b>             | 12985 / 0 / 649                                                                                | 16899 / 0 / 901                                                                                |
| <b>Goodness-of-fit in F<sup>2</sup></b>       | 1.095                                                                                          | 1.054                                                                                          |
| <b>Final R indexes [I&gt;2sigma(I)]</b>       | R1 = 0.0332                                                                                    | R1 = 0.0511                                                                                    |
|                                               | wR2 = 0.0683                                                                                   | wR2 = 0.1545                                                                                   |
| <b>R indices (all data)</b>                   | R1 = 0.0399                                                                                    | R1 = 0.0637                                                                                    |
|                                               | wR2 = 0.0710                                                                                   | wR2 = 0.1617                                                                                   |
| <b>Largest peak and hole/e·Å<sup>-3</sup></b> | 2.27 and -1.57                                                                                 | 4.467 and -8.373                                                                               |
